# Supplementary material for: Dynamic Changes in the NK-, Neutrophil-, and B-cell Immunophenotypes Relevant in High Metastatic Risk Post Neoadjuvant Chemotherapy–Resistant Early Breast Cancers
Source: PubMed Central journal article supplement — Clin Cancer Res. 2022 Sep 26;28(20):4494–508. doi: 10.1158/1078-0432.CCR-22-0543 (PMC9561554; doi:10.1158/1078-0432.ccr-22-0543), 2022-09-26
Supplement: ccr-22-0543_supplementary_figure_s3_suppsf3.pdf [file ccr-22-0543_supplementary_figure_s3_suppsf3.pdf]

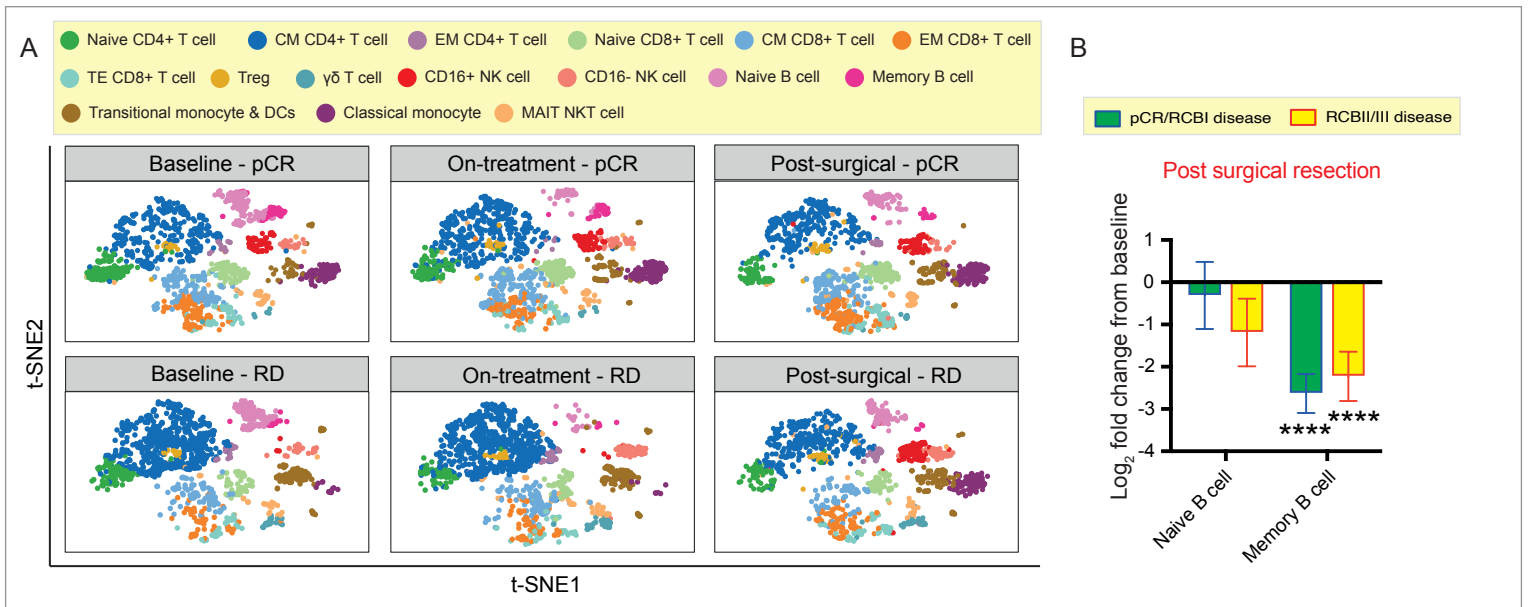

Figure S3| Cell family analysis of liquid CyTOF profiling of patient PBMCs.

A) t-SNE analysis of matched PBMCs samples from patients with RD (n=4) and pCR (n=4) at baseline, on-treatment and post-surgery showing expression of 16 immune cell populations.

B) Log fold change in naïve and memory B cell clusters at post surgical timepoint, compared to baseline (n=14) LIMMA test.
